# Supplementary material for: A recombinant measles virus vaccine strongly reduces SHIV viremia and virus reservoir establishment in macaques
Source: PubMed Central journal article supplement (PMC8536681; doi:10.1038/s41541-021-00385-6), 2021-10-22
Supplement: 41541_2021_385_MOESM1_ESM.pdf [file 41541_2021_385_MOESM1_ESM.pdf]

## Supplementary data:

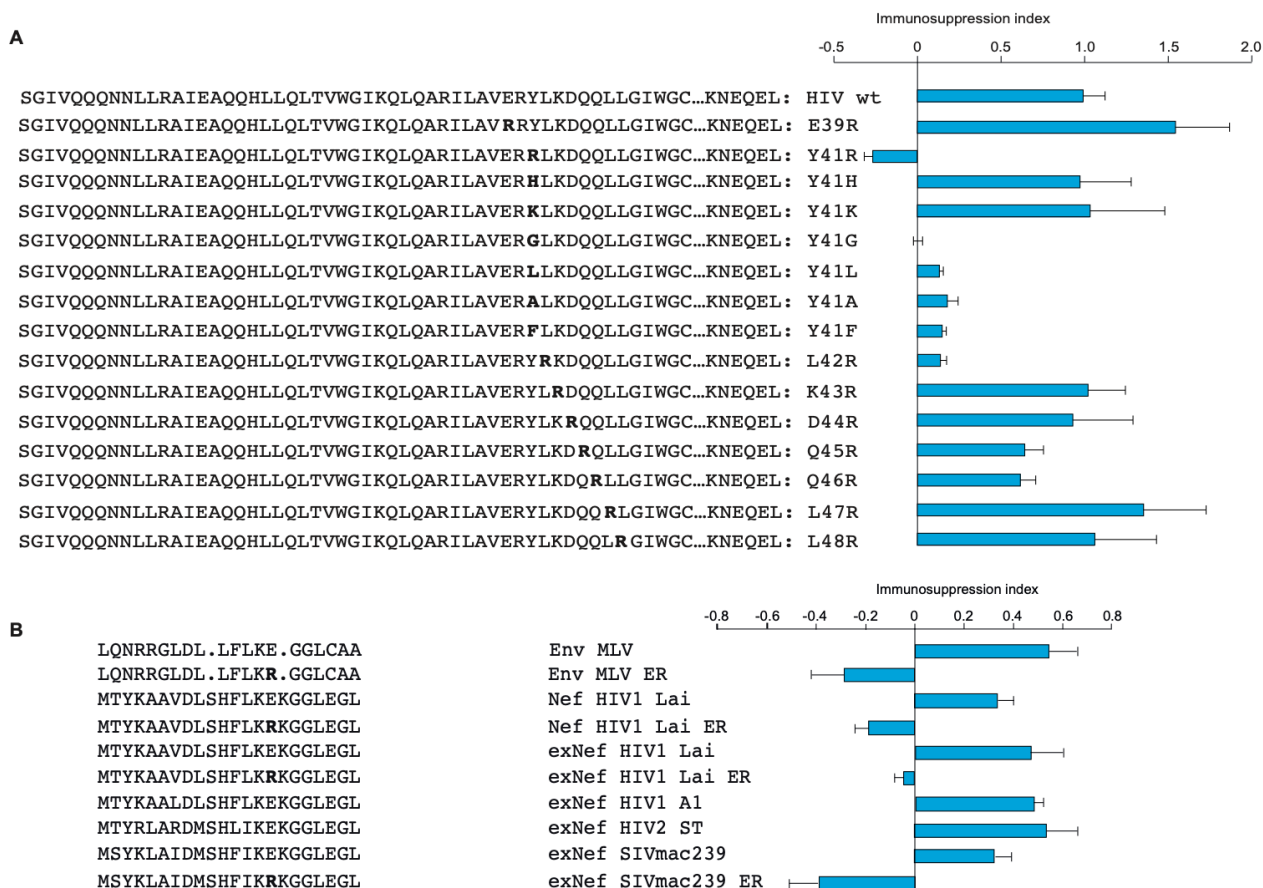

## Supplementary Figure 1: Identification of HIV Env and SIV Nef IS domain mutations in tumor rejection assays

**A. HIV Env.** Left, wild-type and mutant sequences (mutated amino-acids are in bold) of HIV IS domain. Right, *in vivo* IS activity of Env wild-type and mutant proteins expressed in grafted tumor cells. Immunosuppressive indexes are based on the tumor size measurement of mice following s.c. injection of IS domain-expressing cells versus control cells. The Y41R mutation was selected for introduction in the MV-SHIV. **B. HIV and SIV Nef.** Left, conserved sequences of MLV Env (murine leukemia virus) and HIV-1, HIV-2, SIV Nef proteins with position of the selected E to R mutation indicated in bold. Right, *in vivo* IS activity of Nef wild-type and mutant proteins expressed in grafted tumor cells. exNef: excreted Nef: Nef protein is fused with a signal sequence resulting in its cellular export and lack of myristoylation. Mean values  $\pm$  standard deviations (SD) are indicated.

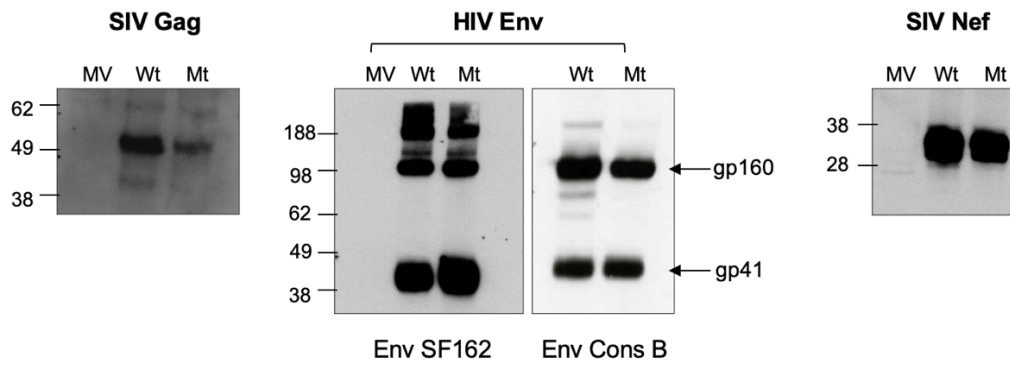

**Supplementary Figure 2: Recombinant MV vectors expressing SHIV antigens.**

Western blot analysis of SHIV proteins expression in cell lysates of Vero cells infected by MV or MV-SHIV viruses (MV: MV control, Wt: MV-SHIV Wt, Mt: MV-SHIV Mt). 2F12 monoclonal antibody was used for SIV Gag, F240 for HIV Env, MA1-71522 for SIV Nef.

|                  |                 |       |       |       |        |        |        |       |       |
|------------------|-----------------|-------|-------|-------|--------|--------|--------|-------|-------|
| Vaccine-controls | base line       |       |       |       |        |        |        |       |       |
|                  |                 | BV165 | BW695 | CA117 | CA870N | CBD006 | BV834  | CB135 | CG393 |
|                  | HIV-1 SF162     | <16   | <16   | <16   | <16    | <16    | <16    | <16   | <16   |
|                  | SHIV162p3       | <16   | <16   | <16   | <16    | <16    | <16    | <16   | <16   |
|                  | HIV-1 QH10      | <16   | <16   | <16   | <16    | <16    | <16    | <16   | <16   |
|                  | post-boosts     |       |       |       |        |        |        |       |       |
|                  |                 | BV165 | BW695 | CA117 | CA870N | CBD006 | BV834  | CB135 | CG393 |
|                  | HIV-1 SF162     | <16   | <16   | <16   | <16    | <16    | <16    | <16   | <16   |
|                  | SHIV162p3       | <16   | <16   | <16   | <16    | <16    | <16    | <16   | <16   |
|                  | HIV-1 QH10      | <16   | <16   | <16   | <16    | <16    | <16    | <16   | <16   |
|                  | post-challenges |       |       |       |        |        |        |       |       |
|                  |                 | BV165 | BW695 | CA117 | CA870N | CBD006 | BV834  | CB135 | CG393 |
| HIV-1 SF162      | <16             | <16   | <16   | <16   | <16    | <16    | <16    | <16   |       |
| SHIV162p3        | <16             | <16   | <16   | <16   | <16    | <16    | <16    | <16   |       |
| HIV-1 QH10       | <16             | <16   | <16   | <16   | <16    | <16    | <16    | <16   |       |
| MV-SHIV wt       | base line       |       |       |       |        |        |        |       |       |
|                  |                 | BX409 | BY250 | BW430 | CBE002 | BZ509  | CB637  | BY549 | BY791 |
|                  | HIV-1 SF162     | <16   | <16   | <16   | <16    | <16    | <16    | <16   | <16   |
|                  | SHIV162p3       | <16   | <16   | <16   | <16    | <16    | <16    | <16   | <16   |
|                  | HIV-1 QH10      | <16   | <16   | <16   | <16    | <16    | <16    | <16   | <16   |
|                  | post-boosts     |       |       |       |        |        |        |       |       |
|                  |                 | BX409 | BY250 | BW430 | CBE002 | BZ509  | CB637  | BY549 | BY791 |
|                  | HIV-1 SF162     | 64    | <16   | <16   | 200    | <16    | <16    | <16   | <16   |
|                  | SHIV162p3       | <16   | <16   | <16   | <16    | <16    | <16    | <16   | <16   |
|                  | HIV-1 QH10      | <16   | <16   | <16   | <16    | <16    | <16    | <16   | <16   |
|                  | post-challenges |       |       |       |        |        |        |       |       |
|                  |                 | BX409 | BY250 | BW430 | CBE002 | BZ509  | CB637  | BY549 | BY791 |
| HIV-1 SF162      | 50              | 70    | 200   | 230   | <16    | <16    | 150    | <16   |       |
| SHIV162p3        | <16             | <16   | <16   | <16   | <16    | <16    | <16    | <16   |       |
| HIV-1 QH10       | <16             | <16   | <16   | <16   | <16    | <16    | <16    | <16   |       |
| MVSHIV IS Mt     | base line       |       |       |       |        |        |        |       |       |
|                  |                 | BW821 | BX109 | BX879 | CG581  | BV285  | CBD005 | CA142 | CG889 |
|                  | HIV-1 SF162     | <16   | <16   | <16   | <16    | <16    | <16    | <16   | <16   |
|                  | SHIV162p3       | <16   | <16   | <16   | <16    | <16    | <16    | <16   | <16   |
|                  | HIV-1 QH10      | <16   | <16   | <16   | <16    | <16    | <16    | <16   | <16   |
|                  | post-boosts     |       |       |       |        |        |        |       |       |
|                  |                 | BW821 | BX109 | BX879 | CG581  | BV285  | CBD005 | CA142 | CG889 |
|                  | HIV-1 SF162     | <16   | <16   | <16   | <16    | <16    | <16    | <16   | <16   |
|                  | SHIV162p3       | <16   | <16   | <16   | <16    | <16    | <16    | <16   | <16   |
|                  | HIV-1 QH10      | <16   | <16   | <16   | <16    | <16    | <16    | <16   | <16   |
|                  | post-challenges |       |       |       |        |        |        |       |       |
|                  |                 | BW821 | BX109 | BX879 | CG581  | BV285  | CBD005 | CA142 | CG889 |
| HIV-1 SF162      | <16             | 250   | <16   | <16   | <16    | <16    | 250    | <16   |       |
| SHIV162p3        | <16             | <16   | <16   | <16   | <16    | <16    | <16    | <16   |       |
| HIV-1 QH10       | <16             | <16   | <16   | <16   | <16    | <16    | <16    | <16   |       |

**Supplementary Table 1: Neutralization activity of MV-SHIV-induced antibodies.**

Assays of neutralizing activity in serum from vaccine-controls (measles virus, MV) or vaccinated macaques with MV-SHIV Wt or MV-SHIV Mt against HIV-1-SF162, SHIV162p3 or HIV-1 QHO pseudoviruses. Serums were collected at base line (pre-prime, week -2), post-boosts (4 weeks post-boost2, week +33), and post-challenge (3 weeks post first positive qRT-PCR, W+3 post infection). IC50: 50% inhibitory concentration, ND: not done.

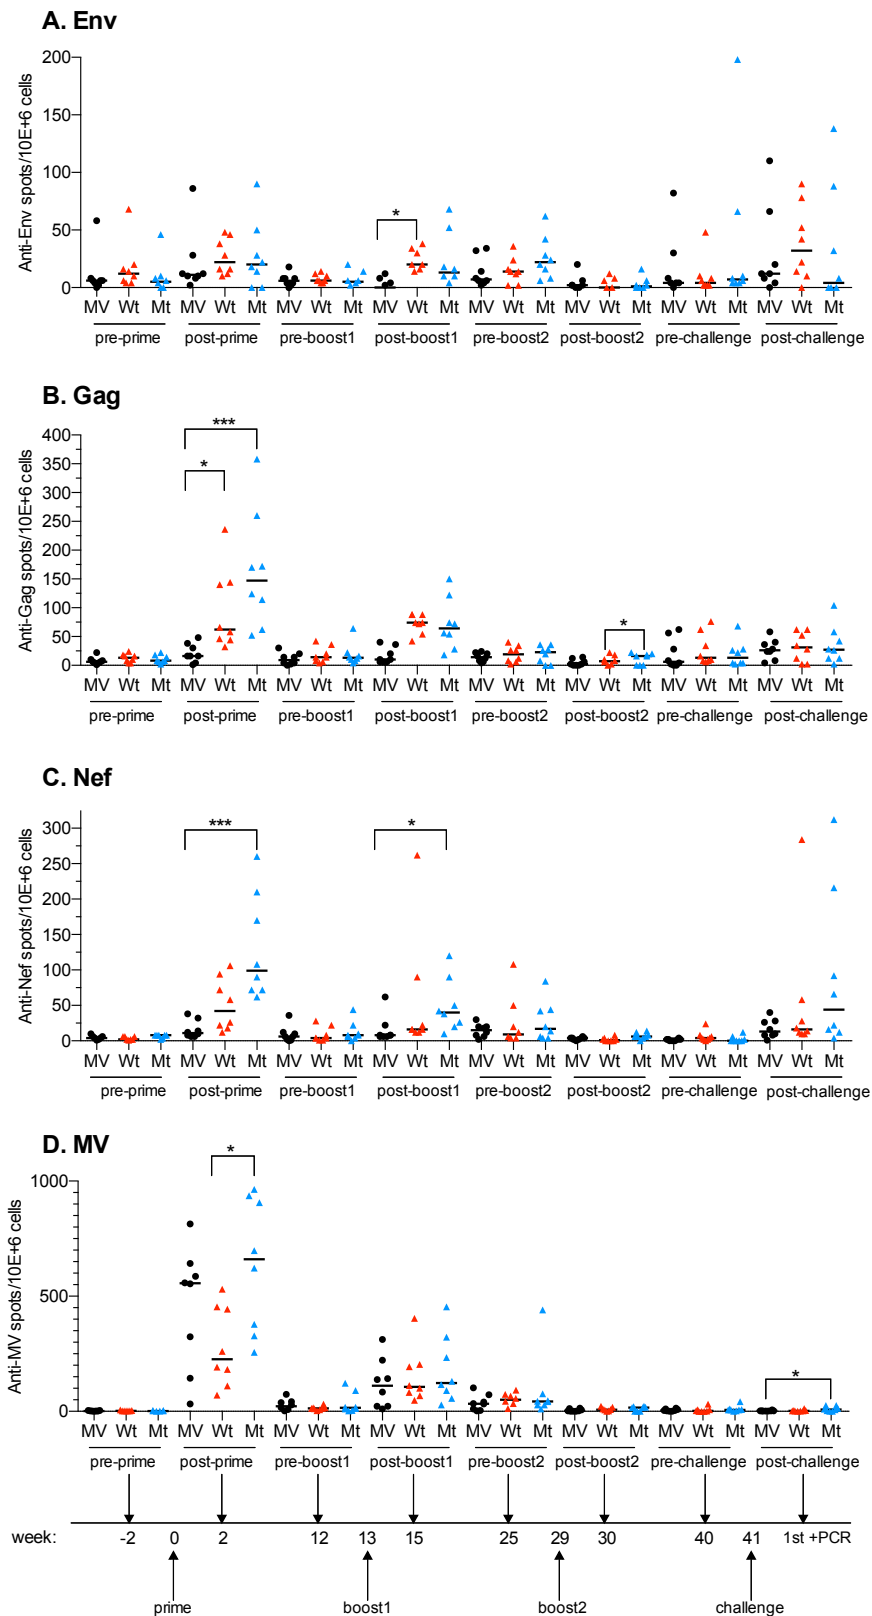

**Supplementary Figure 3: longitudinal vaccine-elicited cellular immune responses.**

**A-D:** Flisspots assays (fluorospot assays), IFN- $\gamma$  producing cells specific to (A) Env, (B) Gag, (C) Nef and (D) MV proteins. P values are calculated by the Kruskal-Wallis and Dunn's multiple comparisons tests. NS  $p > 0.05$ , \* $p < 0.05$ , \*\* $p < 0.01$ , \*\*\* $p < 0.001$ . Group medians are plotted as horizontal line. Serum or PBMC were collected at pre-prime (week -2), post-prime (week +2), pre-boost1 (week +12), post-boost2 (week +15), pre-boost2 (week +25), post-boost2 (week +30), pre-challenge (week+40) and post-challenge (2 weeks post first positive qRT-PCR for SHIV162p3 RNA in plasma).

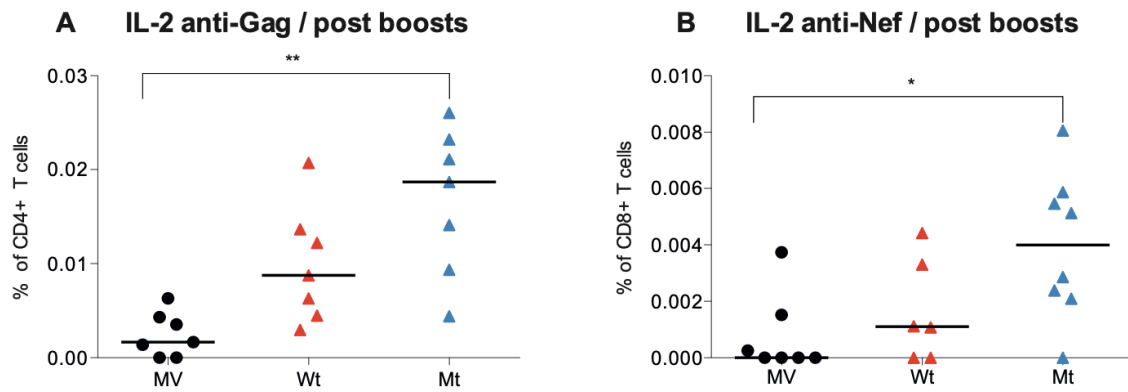

**Supplementary Figure 4: Mutations of Nef and Env IS domains increase cellular immune responses.**

**A. B.** Vaccine-induced cellular responses analyzed post-boost 2 measured by IL2 intracellular staining (ICS) assays. MV indicates prime/boost with empty MV vector, Wt with MV-SHIV-Wt, and Mt with MV-SHIV-Mt. Statistical analyses are performed with the Kruskal-Wallis test and Dunn's multiple comparisons tests: NS  $p > 0.05$ , \* $p < 0.05$ , \*\* $p < 0.01$ , \*\*\* $p < 0.001$ . Group medians are plotted as horizontal line.

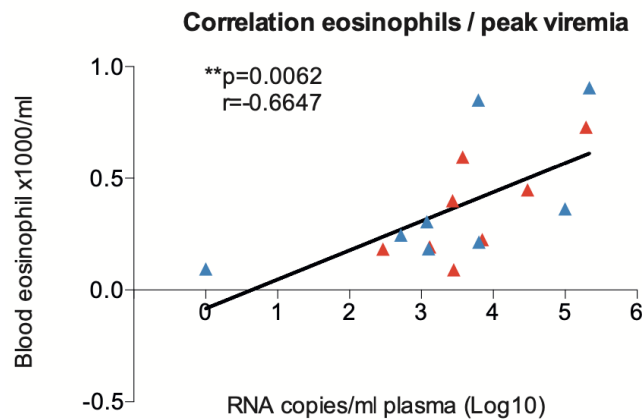

**Supplementary Figure 5: Blood eosinophil counts correlated with plasma viremia in immunized animals (peak viremia).**

For animals vaccinated with MV-SHIV Wt or Mt: correlation of the average eosinophil count over the course of the study (immunization and viral challenges) with peak viremia. P values reflect Spearman correlation non-parametric tests, two-tailed p-value. \*\* $p < 0.01$ .

**Step 1 :**

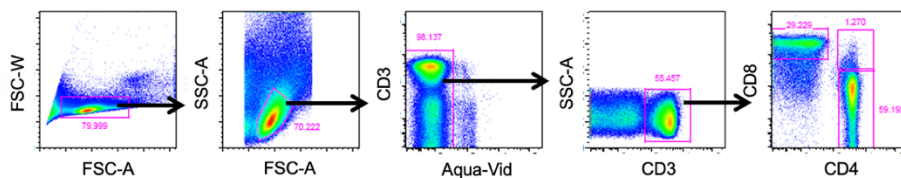

**Step 2 :**

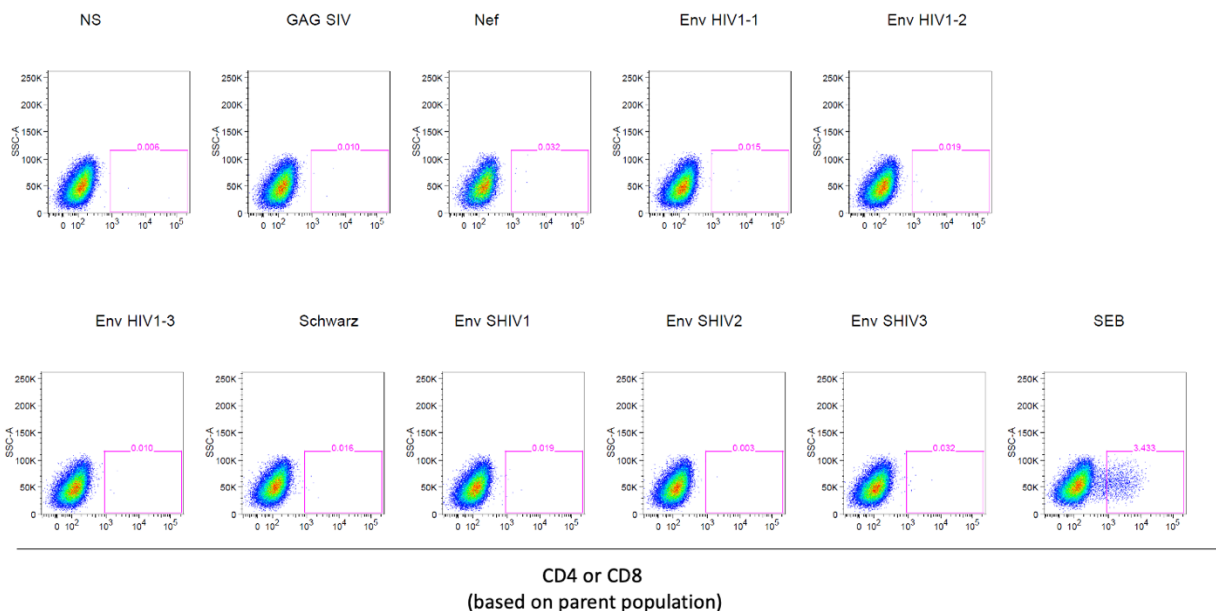

CD4 or CD8  
(based on parent population)

**Supplementary Figure 6: Gating strategy.**

Singlet were selected on FSC-W vs FSC-A gating. PBMC, and particularly lymphocytes, were selected on SSC-A vs FSC-A gating; alive cells were selected as negative cells for Aqua-vid. T lymphocyte were selected based on their expression of CD3. T CD4, T CD8 and double positive cells were devised corresponding their expression of CD4 and CD8. Then for each population, expression of each marker was analyzed for all stimulations (IL2, IFNg, CD154 or TNF-a).
